# Supplementary material for: Genetic and neural bases of the neuroticism general factor
Source: bioRxiv or medRxiv preprint supplement (doi:10.1101/2023.03.08.531776), 2023-09-02
Supplement: Supplementary file [file media-1.pdf]

# Supplementary Material

## Genetic and neural bases of the Neuroticism general factor

We calculated genetic correlations between the Neuroticism general factor and the following traits:

- subjective well-being (Okbay et al., [2016](#))
- household income (Hill et al., [2019](#))
- risk tolerance (Linnér et al., [2019](#))
- morning person (Hu et al., [2016](#))
- Townsend Deprivation Index (Hill et al., [2019](#))
- years of education (Lee et al., [2018](#))
- IQ (i.e., cognitive performance) (Lee et al., [2018](#))
- brain volume (Jansen et al., [2020](#))
- autism spectrum disorder (ASD) (Grove et al., [2019](#))
- schizophrenia (Pardiñas et al., [2018](#))
- bipolar disorder (Mullins et al., [2021](#))
- attention deficit/hyperactivity disorder (ADHD) (Demontis et al., [2019](#))
- obsessive compulsive disorder (OCD) (International Obsessive Compulsive Disorder Foundation Genetics Collaborative & OCD Collaborative Genetics Association Studies, [2018](#))
- major depressive disorder (Howard et al., [2019](#))
- number of children (Barban et al., [2016](#))

- number of sex partners (Linnér et al., [2019](#))
- drinks per week (Linnér et al., [2019](#))
- cannabis use disorder (CUD) (Johnson et al., [2020](#))

Supplementary Fig. [S3](#) presents the genetic correlations between the Neuroticism general factor and our selected traits studied in GWAS. The pattern of results—most notably the genetic correlations of large magnitude with subjective well-being and major depression—are indeed very similar to what has been obtained with observed measures of Neuroticism (Baselmans et al., [2019](#); Luciano et al., [2018](#); Nagel et al., [2018](#); Okbay et al., [2016](#); Turley et al., [2018](#)).

## References

- Barban, N., Jansen, R., de Vlaming, R., Vaez, A., Mandemakers, J., Tropf, F. C., Shen, X., Wilson, J. F., Chasman, D. I., Nolte, I. M., Tragante, V., van der Laan, S. W., BIOS Consortium, Ahluwalia, T. S., Albrecht, E., Yerges-Armstrong, L. M., Atzmon, G., Auro, K., Ayers, K. L., . . . Mills, M. C. (2016). Genome-wide analysis identifies 12 loci influencing human reproductive behavior. *Nature Genetics*, *48*, 1462–1472. <https://doi.org/10.1038/ng.3698>
- Baselmans, B. M. L., Jansen, R., Ip, H. F., van Dongen, J., Abdellaoui, A., van de Weijer, M. P., Bao, Y., Smart, M., Kumari, M., Willemsen, G., Hottenga, J.-J., BIOS Consortium, Social Science Genetic Association Consortium, Boomsma, D. I., de Geus, E. J. C., Nivard, M. G., & Bartels, M. (2019). Multivariate genome-wide analyses of the well-being spectrum. *Nature Genetics*, *51*, 445–451. <https://doi.org/10.1038/s41588-018-0320-8>
- Demontis, D., Walters, R. K., Martin, J., Mattheisen, M., Als, T. D., Agerbo, E., Baldursson, G., Belliveau, R., Bybjerg-Grauholm, J., Bækvad-Hansen, M., Cerrato, F., Chambert, K., Churchhouse, C., Dumont, A., Eriksson, N., Gandal, M., Goldstein, J. I., Grasby, K. L., Grove, J., . . . Neale, B. M. (2019). Discovery of the first genome-wide significant risk loci for attention deficit/hyperactivity disorder. *Nature Genetics*, *51*, 63–75. <https://doi.org/10.1038/s41588-018-0269-7>
- Grove, J., Ripke, S., Als, T. D., Mattheisen, M., Walters, R. K., Won, H., Pallesen, J., Agerbo, E., Andreassen, O. A., Anney, R., Awasthi, S., Belliveau, R., Bettella, F., Buxbaum, J. D., Bybjerg-Grauholm, J., Bækvad-Hansen, M., Cerrato, F., Chambert, K., Christensen, J. H., . . . Børglum, A. D. (2019). Identification of common genetic risk variants for autism spectrum disorder. *Nature Genetics*, *51*, 431–444. <https://doi.org/10.1038/s41588-019-0344-8>
- Hill, W. D., Davies, N. M., Ritchie, S. J., Skene, N. G., Bryois, J., Bell, S., Di Angelantonio, E., Roberts, D. J., Xueyi, S., Davies, G., Liewald, D. C. M., Porteous, D. J., Hayward, C., Butterworth, A. S., McIntosh, A. M., Gale, C. R., & Deary, I. J. (2019). Genome-wide analysis identifies molecular systems and 149 genetic loci associated with income. *Nature Communications*, *10*, 5741. <https://doi.org/10.1038/s41467-019-13585-5>
- Howard, D. M., Adams, M. J., Clarke, T.-K., Hafferty, J. D., Gibson, J., Shirali, M., Coleman, J. R. I., Hagenaars, S. P., Ward, J., Wigmore, E. M., Alloza, C., Shen, X., Barbu, M. C., Xu, E. Y., Whalley, H. C., Marioni, R. E., Porteous, D. J., Davies, G., Deary, I. J., . . . McIntosh, A. M. (2019). Genome-wide meta-analysis of depression identifies 102 independent variants and highlights the importance of the prefrontal brain regions. *Nature Neuroscience*, *22*, 343–352. <https://doi.org/10.1038/s41593-018-0326-7>
- Hu, Y., Shmygelska, A., Tran, D., Eriksson, N., Tung, J. Y., & Hinds, D. A. (2016). GWAS of 89,283 individuals identifies genetic variants associated with self-reporting of being a morning person. *Nature Communications*, *7*, 10448. <https://doi.org/10.1038/ncomms10448>
- International Obsessive Compulsive Disorder Foundation Genetics Collaborative, & OCD Collaborative Genetics Association Studies. (2018). Revealing the complex genetic architecture of obsessive-compulsive disorder using meta-analysis. *Molecular Psychiatry*, *23*, 1181–1188. <https://doi.org/10.1038/mp.2017.154>
- Jansen, P. R., Nagel, M., Watanabe, K., Wei, Y., Savage, J. E., de Leeuw, C. A., Heuvel, M. P., van der Sluis, S., & Posthuma, D. (2020). Genome-wide meta-analysis of brain volume

- identifies genomic loci and genes shared with intelligence. *Nature Communications*, *11*, 5606. <https://doi.org/10.1038/s41467-020-19378-5>
- Johnson, E. C., Demontis, D., Thorgeirsson, T. E., Walters, R. K., Polimanti, R., Hatoum, A. S., Sanchez-Roige, S., Paul, S. E., Wendt, F. R., Clarke, T.-K., Lai, D., Reginsson, G. W., Zhou, H., He, J., Baranger, D. A. A., Gudbjartsson, D. F., Wedow, R., Adkins, D. E., Adkins, A. E., . . . Agrawal, A. (2020). A large-scale genome-wide association study meta-analysis of cannabis use disorder. *Lancet Psychiatry*, *7*, 1032–1045. [https://doi.org/10.1016/s2215-0366\(20\)30339-4](https://doi.org/10.1016/s2215-0366(20)30339-4)
- Lee, J. J., Wedow, R., Okbay, A., Kong, E., Maghzian, O., Zacher, M., Nguyen-Viet, T. A., Bowers, P., Sidorenko, J., Linnér, R. K., Fontana, M. A., Kundu, T., Lee, C., Li, H., Li, R., Royer, R., Timshel, P. N., Walters, R. K., Willoughby, E. A., . . . Cesarini, D. (2018). Gene discovery and polygenic prediction from a genome-wide association study of educational attainment in 1.1 million individuals. *Nature Genetics*, *50*, 1112–1121. <https://doi.org/10.1038/s41588-018-0147-3>
- Linnér, R. K., Biroli, P., Kong, E., Meddens, S. F. W., Wedow, R., Fontana, M. A., Lebreton, M., Tino, S. P., Abdellaoui, A., Hammerschlag, A. R., Nivard, M. G., Okbay, A., Rietveld, C. A., Timshel, P. N., Trzaskowski, M., Vlaming, R. d., Zünd, C. L., Bao, Y., Buzdugan, L., . . . Beauchamp, J. P. (2019). Genome-wide association analyses of risk tolerance and risky behaviors in over 1 million individuals identify hundreds of loci and shared genetic influences. *Nature Genetics*, *51*, 245–257. <https://doi.org/10.1038/s41588-018-0309-3>
- Luciano, M., Hagenaars, S. P., Davies, G., Hill, W. D., Clarke, T.-K., Shirali, M., Harris, S. E., Marioni, R. E., Liewald, D. C. M., Fawns-Ritchie, C., Adams, M. J., Howard, D. M., Lewis, C. M., Gale, C. R., McIntosh, A. M., & Deary, I. J. (2018). Association analysis in over 329,000 individuals identifies 116 independent variants influencing neuroticism. *Nature Genetics*, *50*, 6–11. <https://doi.org/10.1038/s41588-017-0013-8>
- Mullins, N., Forstner, A. J., O’Connell, K. S., Coombes, B., Coleman, J. R. I., Qiao, Z., Als, T. D., Bigdeli, T. B., Børte, S., Bryois, J., Charney, A. W., Drange, O. K., Gandal, M. J., Hagenaars, S. P., Ikeda, M., Kamitaki, N., Kim, M., Krebs, K., Panagiotaropoulou, G., . . . Gawlik, M. (2021). Genome-wide association study of more than 40,000 bipolar disorder cases provides new insights into the underlying biology. *Nature Genetics*, *53*, 817–829. <https://doi.org/10.1038/s41588-021-00857-4>
- Nagel, M., Jansen, P. R., Stringer, S., Watanabe, K., de Leeuw, C. A., Bryois, J., Savage, J. E., Hammerschlag, A. R., Skene, N. G., Muñoz-Manchado, A. B., 23andMe Research Team, White, T., Tiemeier, H., Linnarsson, S., Hjerling Leffler, J., Polderman, T. J. C., Sullivan, P. F., van der Sluis, S., & Posthuma, D. (2018). Meta-analysis of genome-wide association studies for neuroticism in 449,484 individuals identifies novel genetic loci and pathways. *Nature Genetics*, *50*, 920–927. <https://doi.org/10.1038/s41588-018-0151-7>
- Okbay, A., Baselmans, B. M. L., De Neve, J.-E., Turley, P., Nivard, M. G., Fontana, M. A., Meddens, S. F. W., Linnér, R. K., Rietveld, C. A., Derringer, J., Gratten, J., Lee, J. J., Liu, J. Z., de Vlaming, R., Ahluwalia, T. S., Buchwald, J., Cavadino, A., Frazier-Wood, A. C., Fur-lotte, N. A., . . . Cesarini, D. (2016). Genetic variants associated with subjective well-being, depressive symptoms, and neuroticism identified through genome-wide analyses. *Nature Genetics*, *48*, 624–630. <https://doi.org/10.1038/ng.3552>

- Pardiñas, A. S., Holmans, P. A., Pocklington, A. J., Escott-Price, V., Ripke, S., Carrera, N., Legge, S. E., Bishop, S., Cameron, D., Hamshere, M. L., Han, J., Hubbard, L., Lynham, A., Mantripragada, K., Rees, E., MacCabe, J. H., McCarroll, S. A., Baune, B. T., Breen, G., . . . Walters, J. T. R. (2018). Common schizophrenia alleles are enriched in mutation-intolerant genes and in regions under strong background selection. *Nature Genetics*, *50*, 381–389. <https://doi.org/10.1038/s41588-018-0059-2>
- Turley, P., Walters, R. K., Maghzian, O., Okbay, A., Lee, J. J., Fontana, M. A., Nguyen-Viet, T. A., Wedow, R., Zacher, M., Furlotte, N. A., 23andMe Research Team, Social Science Genetic Association Consortium, Magnusson, P., Oskarsson, S., Johannesson, M., Visscher, P. M., Laibson, D. I., Cesarini, D., Neale, B. M., & Benjamin, D. J. (2018). Multi-trait analysis of genome-wide association study summary statistics using MTAG. *Nature Genetics*, *50*, 229–237. <https://doi.org/10.1038/s41588-017-0009-4>

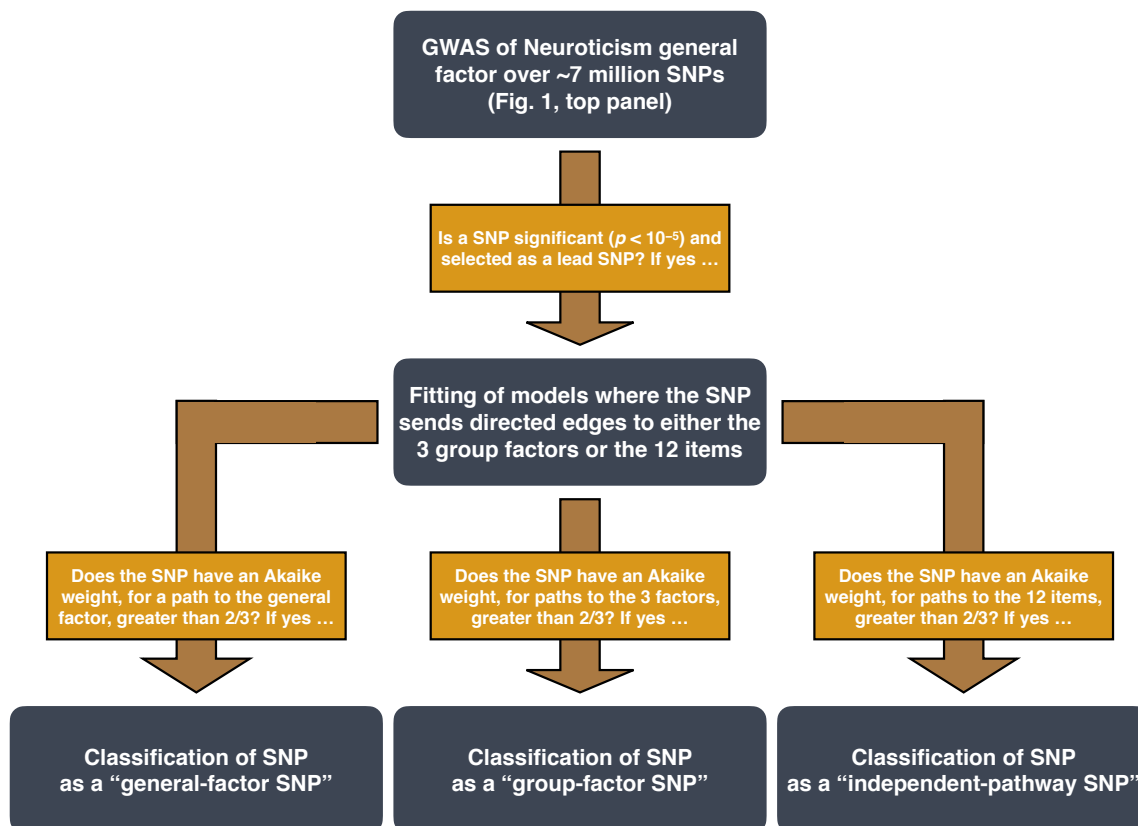

Figure S1: Flowchart of pipeline for our genome-wide association study (GWAS) of the Neuroticism general factor and subsequent classification of lead SNPs. Each gray box corresponds to an analysis step. Later steps use the output of earlier steps as input; such a relationship is represented by a gold arrow. The label of an arrow describes how the output of the prior step was filtered. Path modeling in the context of genetic association testing was conducted with Genomic SEM. Fig. 1 of the main text depicts the general-factor and independent-pathway model. Note that a SNP may not qualify for any of the three classifications in the final step.

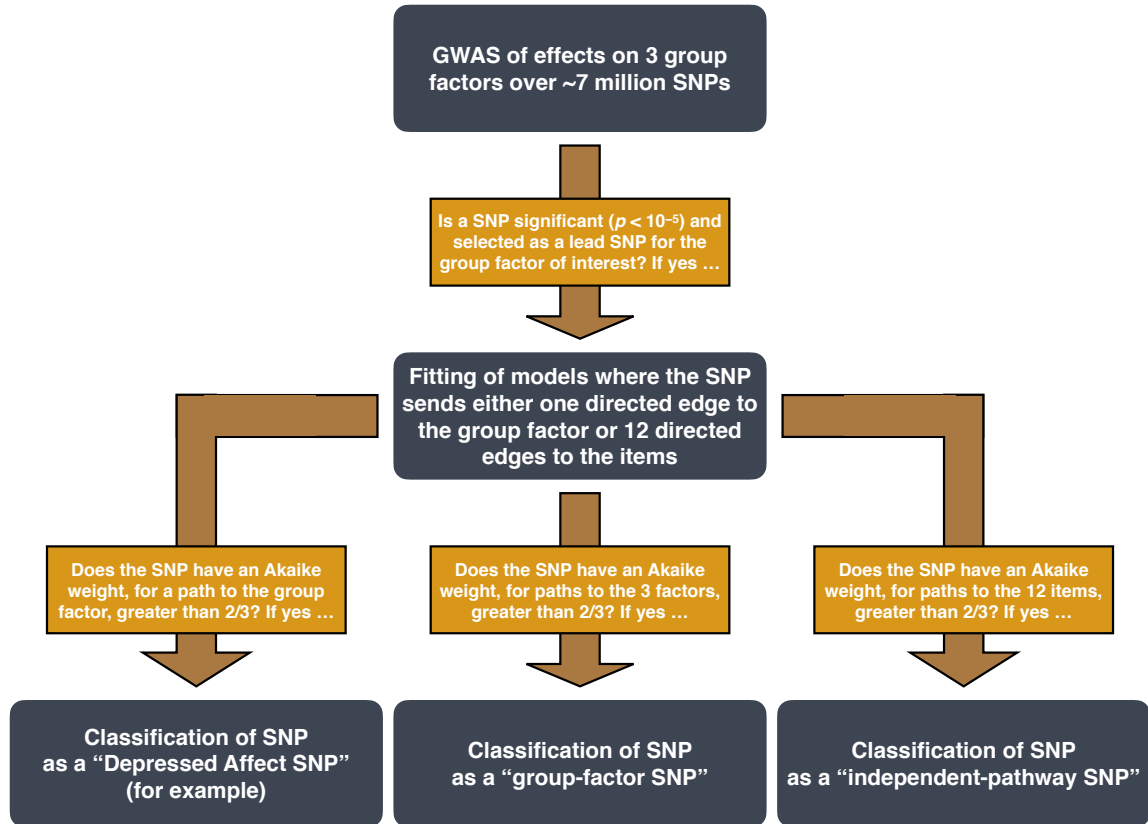

Figure S2: Flowchart of pipeline for our genome-wide association study (GWAS) of the group factors indicated by the Neuroticism items in the Eysenck Personality Questionnaire–Revised Short Form and our subsequent classification of lead SNPs. Each gray box corresponds to an analysis step. Later steps use the output of earlier steps as input; such a relationship is represented by a gold arrow. The label of an arrow describes how the output of the prior step was filtered. Path modeling in the context of genetic association testing was conducted with Genomic SEM. Fig. 1b of the main text depicts the independent-pathway model. Note that a SNP may not qualify for any of the three classifications in the final step.

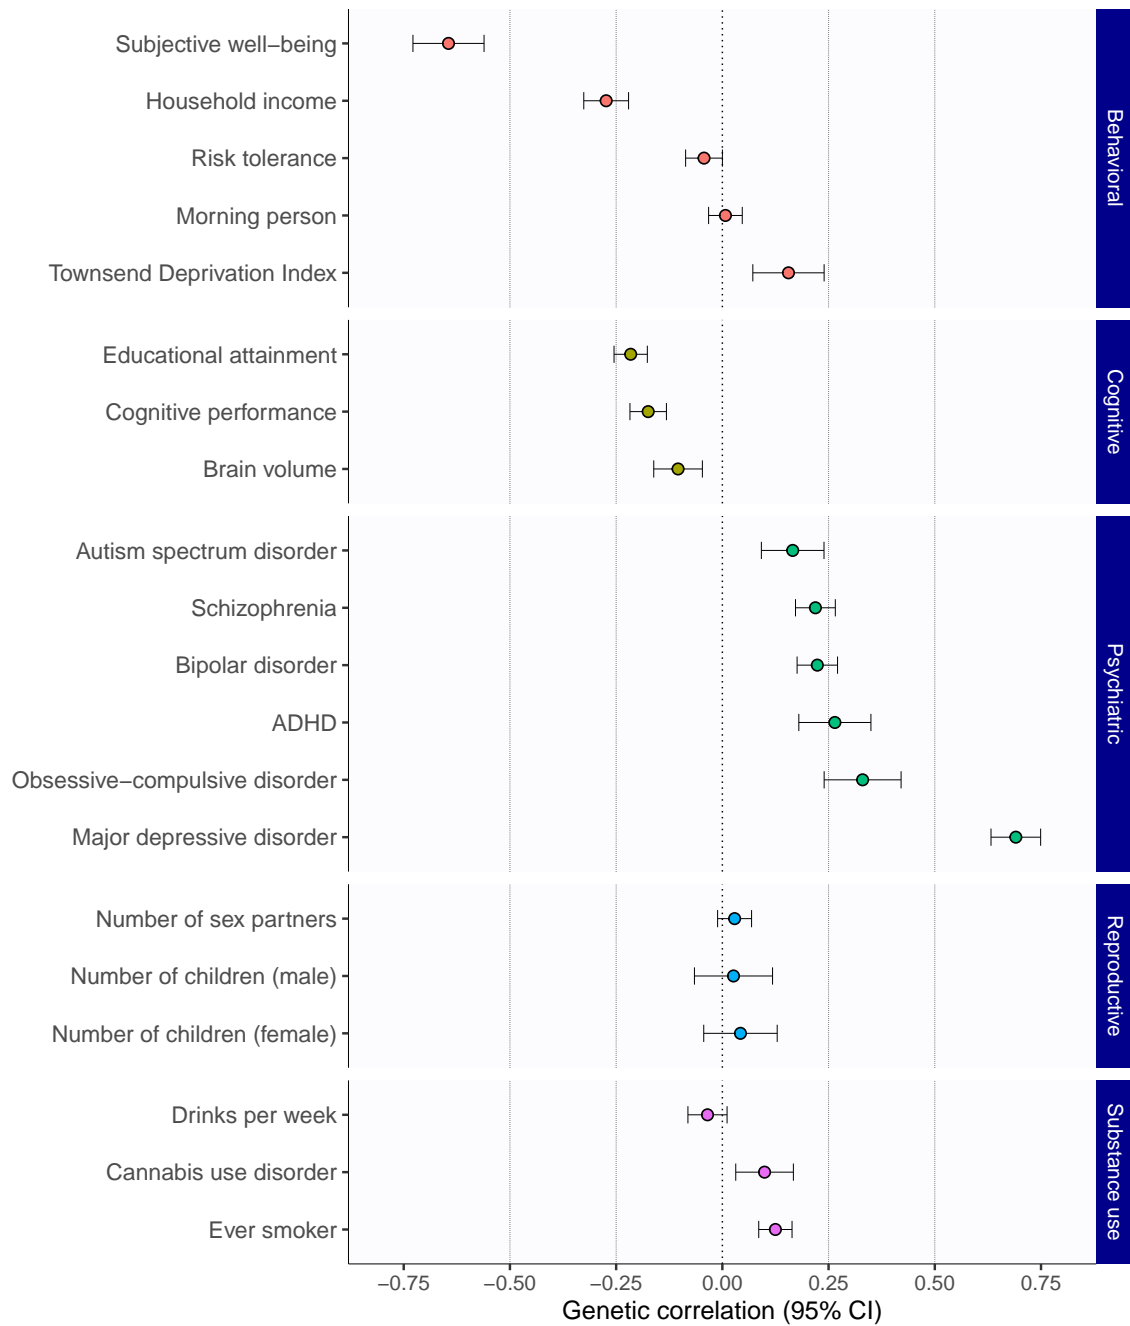

Figure S3: Estimates of the genetic correlations with the Neuroticism general factor and accompanying 95% confidence intervals were calculated with LD Score regression, as called by Genomic SEM. Supplementary Table S1 gives the results in numerical form.
